# Supplementary material for: De Novo Generated Human Red Blood Cells in Humanized Mice Support Plasmodium falciparum Infection
Source: PubMed Central journal article supplement (PMC4476714; doi:10.1371/journal.pone.0129825), 2015-06-22
Supplement: pone.0129825.s006.pdf [file pone.0129825.s006.pdf]

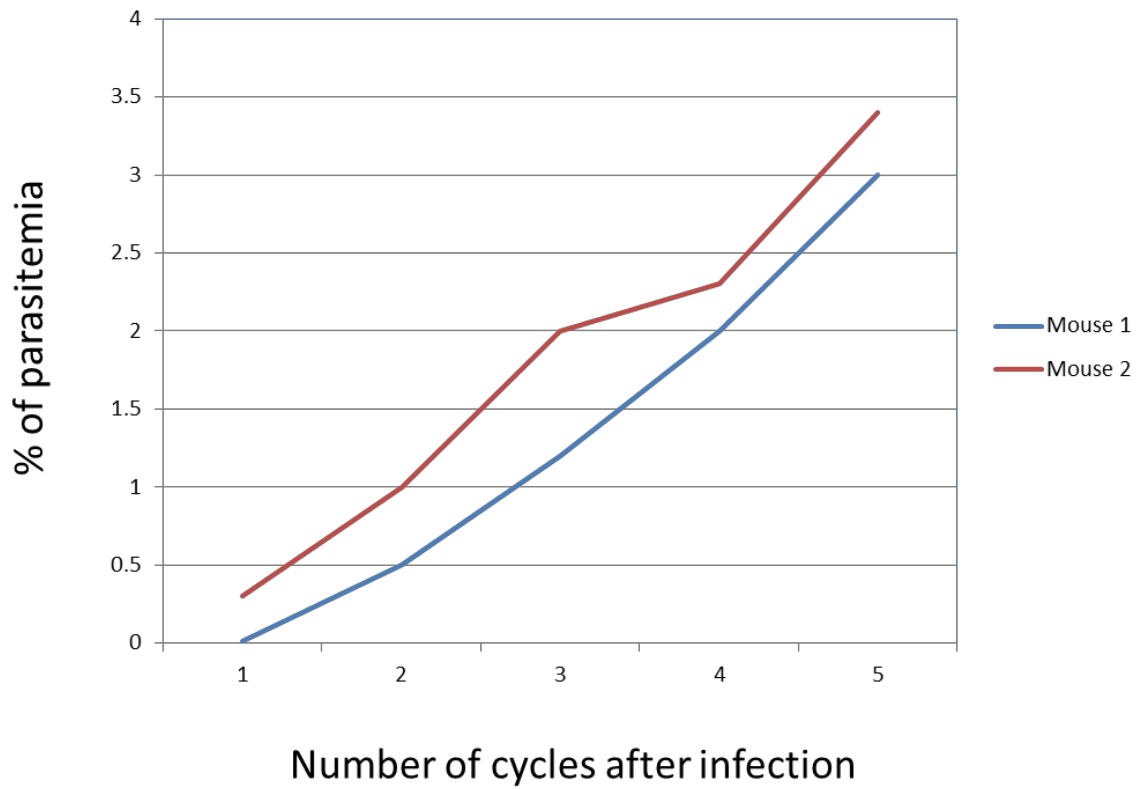

**S6 Fig. Infection of human RBC supplemented NSG mice with adapted *P. falciparum* K1 parasite strain SMG01.** The selected and *in vivo* adapted parasite strain SMG01 can be detected consistently in human RBC-supplemented NSG mice.
