# Supplementary material for: De Novo Generated Human Red Blood Cells in Humanized Mice Support Plasmodium falciparum Infection
Source: PubMed Central journal article supplement (PMC4476714; doi:10.1371/journal.pone.0129825), 2015-06-22
Supplement: pone.0129825.s007.pdf [file pone.0129825.s007.pdf]

| Mouse | % of huRBC | % of parasitemia |                         |
|-------|------------|------------------|-------------------------|
|       |            | Total blood      | Normalized to human RBC |
| M1    | 3          | 0.3              | 10                      |
| M2    | 3          | 0.2              | 6.6                     |
| M3    | 3          | 0.2              | 6.6                     |
| M4    | 2          | 0.02             | 1                       |
| M5    | 4          | 0.58             | 14.5                    |
| M6    | 3.5        | 1.6              | 45.7                    |
| M7    | 3          | 0.3              | 10                      |
| M8    | 3          | 0.3              | 10                      |
| M9    | 3          | 0.2              | 6.6                     |
| M10   | 3.7        | 0.37             | 10                      |
| M11   | 1.8        | 0.26             | 14                      |
| M12   | 1.6        | 0.95             | 59.3                    |
| M13   | 1.6        | 0.76             | 47.5                    |
| M14   | 2.2        | 0.6              | 27                      |

**S1 Table. *Ex vivo* infection of human RBCs from humanized mice by *P. falciparum* (3D7).** Total human RBCs and parasitemia in 14 mice are shown. Parasitemia ranged between 0.02% (mouse 4) and 1.6% (mouse 6) or 1% to 59.3% when normalized to human RBCs.
